# Supplementary material for: In situ-grown Mo-doped MOF-derived phosphide supported nanosheets as an efficient bifunctional electrocatalyst towards urea–water electrolysis
Source: Royal Society of Chemistry journal article supplement (doi:10.1039/d3nj01301d), 2023-01-01
Supplement: d3nj01301d1.pdf [file d3nj01301d1.pdf]

## Supporting Information

### In situ-growth Mo-doped MOFs-derived phosphide supported nanosheets as efficient bifunctional electrocatalyst towards urea-water electrolysis

Ying Wu, Junhao Lu, Jinjin Zhao, Ran Zhang, Shaohong Zhang, Zhijuan Wang\*

*Institute of Advanced Synthesis (IAS), School of Chemistry and Molecular Engineering (SCME), Jiangsu National Synergetic Innovation Center for Advanced Materials (SICAM), Nanjing Tech University, 30 South Puzhu Road, Nanjing 211816, PR China*

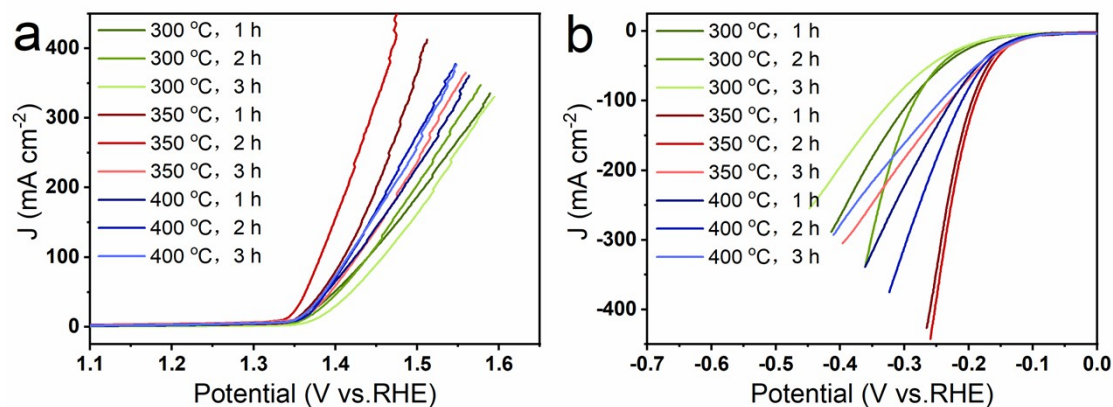

**Fig. S1** LSV curves of Mo-Ni<sub>2</sub>P@NiO/NC/NF samples under different phosphating conditions.

(a) UOR; (b) HER.

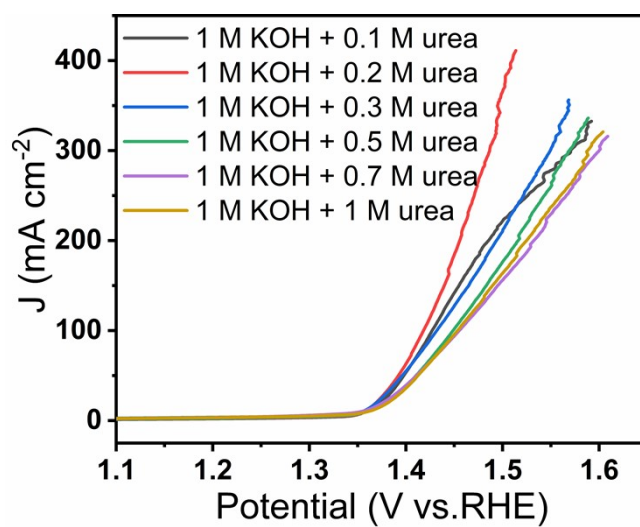

**Fig. S2** LSV curves of Mo-Ni<sub>2</sub>P@NiO/NC/NF in the electrolyte of 1 M KOH + x M urea.

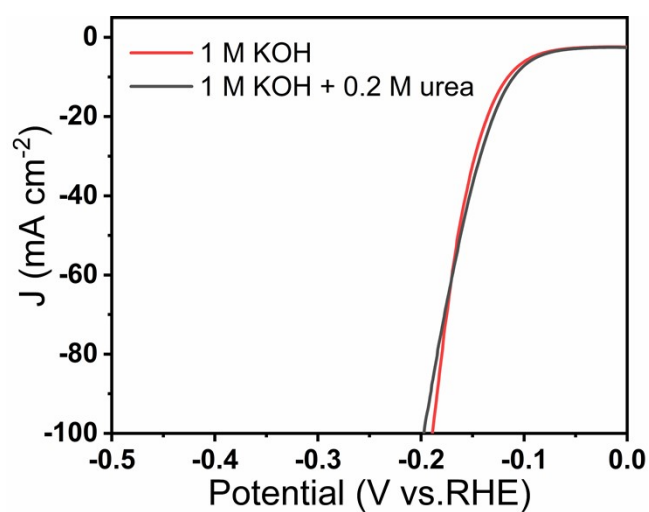

**Fig. S3** HER polarization curves of Mo-Ni<sub>2</sub>P@NiO/NC/NF tested in 1 M KOH electrolyte with or without 0.2 M urea.

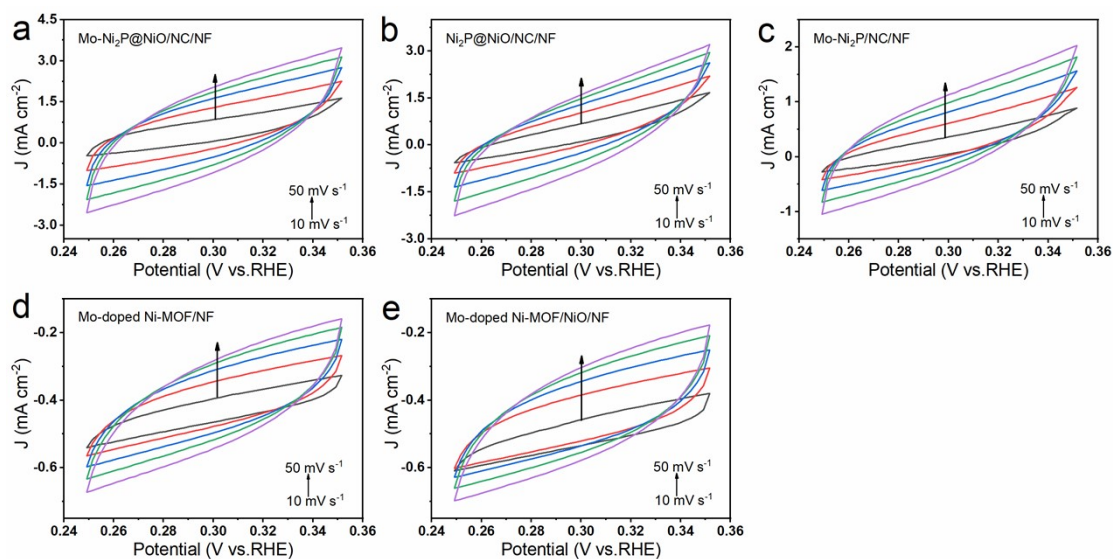

**Fig. S4** CV curves of (a) Mo-Ni<sub>2</sub>P@NiO/NC/NF, (b) Ni<sub>2</sub>P@NiO/NC/NF, (c) Mo-Ni<sub>2</sub>P/NC/NF, (d) Mo-doped Ni-MOF/NF, and (e) Mo-doped Ni-MOF/NiO/NF tested in 1 M KOH with 0.2 M urea electrolyte at the non-faradic potential region (0.25-0.35 V) with different scan rates (10 to 50 mV s<sup>-1</sup>).

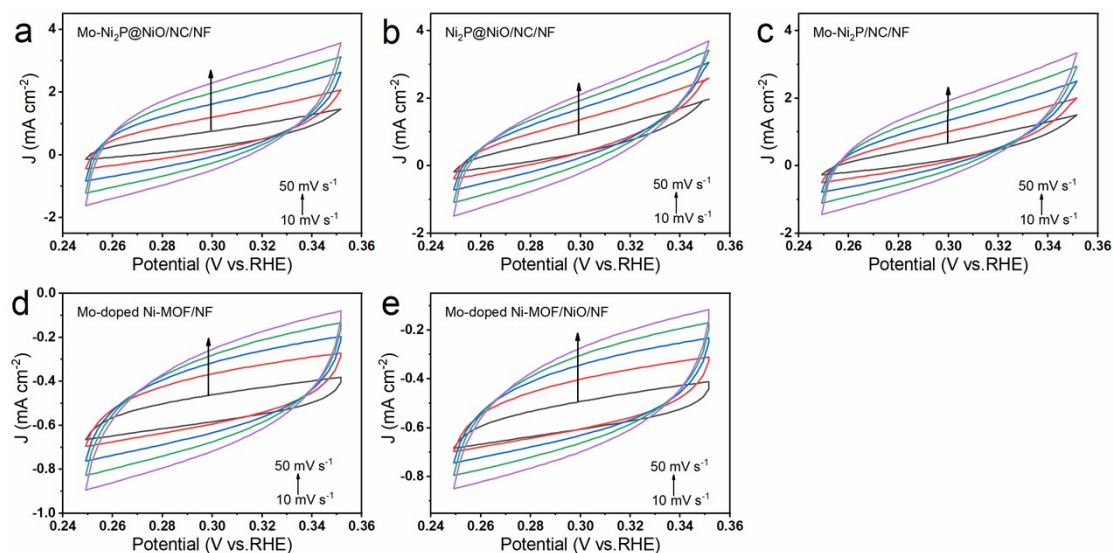

**Fig. S5** CV curves of (a) Mo-Ni<sub>2</sub>P@NiO/NC/NF, (b) Ni<sub>2</sub>P@NiO/NC/NF, (c) Mo-Ni<sub>2</sub>P/NC/NF, (d) Mo-doped Ni-MOF/NF, and (e) Mo-doped Ni-MOF/NiO/NF tested in 1 M KOH electrolyte at 0.25-0.35 V potential window with different scan rates (10 to 50 mV s<sup>-1</sup>).

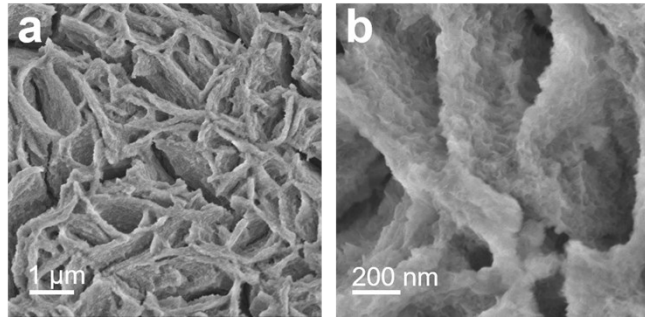

**Fig. S6** (a, b) SEM images of Mo-Ni<sub>2</sub>P@NiO/NC/NF after 20 h UOR long-term test.

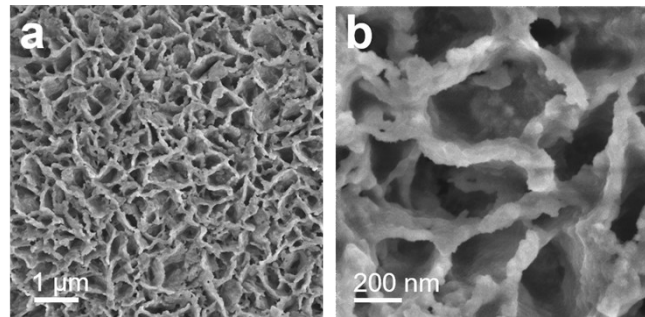

**Fig. S7** (a, b) SEM images of Mo-Ni<sub>2</sub>P@NiO/NC/NF after 20 h HER performance.

**Table S1** Comparison of UOR performance for Mo-Ni<sub>2</sub>P@NiO/NC/NF with other reported Ni-based electrocatalysts.

| Catalyst                                                     | Electrolyte             | E@J (V @mA cm <sup>-2</sup> ) | Tafel slope (mV dec <sup>-1</sup> ) | Ref.      |
|--------------------------------------------------------------|-------------------------|-------------------------------|-------------------------------------|-----------|
| Mo-Ni <sub>2</sub> P@NiO/NC/NF                               | 1 M KOH+<br>0.2 M urea  | 1.335@10<br>1.381@100         | 35.34                               | This work |
| NF/NiMoO-Ar                                                  | 1 M KOH+<br>0.5 M urea  | 1.37@10                       | 19                                  | [1]       |
| Ni-MOF-0.5                                                   | 1 M KOH+<br>0.5 M urea  | 1.381@10                      | 52                                  | [2]       |
| MoS <sub>2</sub> /Ni <sub>3</sub> S <sub>2</sub> /NiFeLDH/NF | 1 M KOH+<br>0.5 M urea  | 1.396@100                     | 36                                  | [3]       |
| MoP@NiCo-LDH/NF                                              | 1 M KOH+<br>0.5 M urea  | 1.392@100                     | 40                                  | [4]       |
| Mo-doped Ni <sub>3</sub> S <sub>2</sub> /NF                  | 1 M KOH+<br>0.3 M urea  | 1.33@10                       | 28.05                               | [5]       |
| NiMo@ZnO/NF                                                  | 1 M KOH+<br>0.33 M urea | 1.405@10                      | 60.2                                | [6]       |
| Ni-MOF                                                       | 1 M KOH+<br>0.33 M urea | 1.36 @10                      | 23                                  | [7]       |
| PBA@MOF-Ni/Se                                                | 1 M KOH+<br>0.5 M urea  | 1.319@10                      | 64                                  | [8]       |
| NiFeMo/NF                                                    | 1 M KOH+<br>0.33 M urea | 1.38@10                       | 43.3                                | [9]       |
| Ni <sub>9</sub> S <sub>8</sub> /CuS/Cu <sub>2</sub> O/NF     | 1 M KOH+<br>0.33 M urea | 1.424@50                      | 64                                  | [10]      |

**Table S2** Comparison of HER performance for Mo-Ni<sub>2</sub>P@NiO/NC/NF with other reported Ni-based electrocatalysts in 1 M KOH solution.

| Catalyst                                                                | $\eta_{j10}$ (mV) | Tafel slope (mV dec <sup>-1</sup> ) | Ref.      |
|-------------------------------------------------------------------------|-------------------|-------------------------------------|-----------|
| Mo-Ni <sub>2</sub> P@NiO/NC/NF                                          | 115               | 69.26                               | This work |
| MoS <sub>2</sub> -Ni <sub>5</sub> Fe <sub>4</sub> S <sub>8</sub> /Fe/NF | 122               | 45.1                                | [11]      |
| NiPS <sub>3</sub> /Ni <sub>2</sub> P                                    | 85                | 82                                  | [12]      |
| P-CoNi <sub>2</sub> S <sub>4</sub> YSSs                                 | 135               | 65                                  | [13]      |
| Mo-doped Ni <sub>3</sub> S <sub>2</sub> /NF                             | 90                | 81.66                               | [5]       |
| PBA@MOF-Ni/Se                                                           | 138               | 87                                  | [8]       |
| Ni <sub>2</sub> P/ZnP <sub>4</sub> /NF-300                              | 255               | 167                                 | [14]      |
| Ni <sub>9</sub> S <sub>8</sub> /CuS/Cu <sub>2</sub> O/NF                | 146               | 163                                 | [10]      |

**Table S3** Comparison of the electrocatalytic activity for bifunctional Mo-Ni<sub>2</sub>P@NiO/NC/NF with other reported Ni-based electrocatalysts towards urea electrolysis.

| Catalyst                                                                                          | Electrolyte            | Voltage (V)<br>@j=10 mA<br>cm <sup>-2</sup> | Ref.      |
|---------------------------------------------------------------------------------------------------|------------------------|---------------------------------------------|-----------|
| Mo-Ni <sub>2</sub> P@NiO/NC/NF Mo-Ni <sub>2</sub> P@NiO/NC/NF                                     | 1 M KOH+0.2<br>M urea  | 1.496                                       | This work |
| Ni-MOF-0.5 Ni-MOF-0.5                                                                             | 1 M KOH+0.5<br>M urea  | 1.52                                        | [2]       |
| Ni-NiO-Mo <sub>0.84</sub> Ni <sub>0.16</sub> /NF Ni-NiO-Mo <sub>0.84</sub> Ni <sub>0.16</sub> /NF | 1 M KOH+0.5<br>M urea  | 1.37                                        | [15]      |
| P-CoNi <sub>2</sub> S <sub>4</sub> YSSs P-CoNi <sub>2</sub> S <sub>4</sub> YSSs                   | 1 M KOH+0.5<br>M urea  | 1.402                                       | [13]      |
| NiMo@ZnO/NF NiMo@ZnO/NF                                                                           | 1 M KOH+0.33<br>M urea | 1.549                                       | [6]       |
| PBA@MOF-Ni/Se PBA@MOF-Ni/Se                                                                       | 1 M KOH+0.5<br>M urea  | 1.491                                       | [8]       |
| NiF <sub>3</sub> /Ni <sub>2</sub> P@CC-2 NiF <sub>3</sub> /Ni <sub>2</sub> P@CC-2                 | 1 M KOH+0.33<br>M urea | 1.54                                        | [16]      |
| Ni@Mo <sub>2</sub> C/CN Ni@Mo <sub>2</sub> C/CN                                                   | 1 M KOH+0.5<br>M urea  | 1.51                                        | [17]      |
| Ni <sub>2</sub> P/ZnP <sub>4</sub> /NF-300 Ni <sub>2</sub> P/ZnP <sub>4</sub> /NF-300             | 1 M KOH+0.5<br>M urea  | 1.521                                       | [14]      |

## References for the Supporting Information

- 1 Z. Y. Yu, C. C. Lang, M. R. Gao, Y. Chen, Q. Q. Fu, Y. Duan and S. H. Yu, *Energ Environ Sci.*, 2018, **11**, 1890-1897.
- 2 S. S. Zheng, Y. Zheng, H. G. Xue and H. Pang, *Chem. Eng. J.*, 2020, **395**, 125166.
- 3 M. X. He, S. N. Hu, C. Q. Feng, H. M. Wu, H. K. Liu and H. Mei, *Int. J. Hydrogen Energy*, 2020, **45**, 23-35.

- 4 T. Wang, H. M. Wu, C. Q. Feng, L. Zhang and J. J. Zhang, *J. Mater. Chem. A*, 2020, **8**, 18106-18116.
- 5 H. Xu, Y. Liao, Z. F. Gao, Y. Qing, Y. Q. Wu and L. Y. Xia, *J. Mater. Chem. A*, 2021, **9**, 3418-3426.
- 6 J. Cao, H. C. Li, R. T. Zhu, L. Ma, K. C. Zhou, Q. P. Wei and F. H. Luo, *J. Alloys Compd.*, 2020, **844**, 155382.
- 7 D. D. Zhu, C. X. Guo, J. L. Liu, L. Wang, Y. Du and S. Z. Qiao, *Chem. Commun.*, 2017, **53**, 10906-10909.
- 8 H. Z. Xu, K. Ye, K. Zhu, Y. Y. Gao, J. L. Yin, J. Yan, G. L. Wang and D. X. Cao, *Inorg. Chem. Front.*, 2021, **8**, 2788-2797.
- 9 Z. H. Lv, Z. H. Li, X. Tan, Z. M. Li, R. Wang, M. J. Wen, X. Liu, G. X. Wang, G. W. Xie and L. H. Jiang, *Appl. Surf. Sci.*, 2021, **552**, 149514.
- 10 D. D. Wei, W. J. Tang and Y. L. Wang, *Int. J. Hydrogen Energy*, 2021, **46**, 20950-20960.
- 11 Y. Wu, F. Li, W. L. Chen, Q. Xiang, Y. L. Ma, H. Zhu, P. Tao, C. Y. Song, W. Shang, T. Deng and J. B. Wu, *Adv. Mater.*, 2018, **30**, 1803151.
- 12 Q. H. Liang, L. X. Zhong, C. F. Du, Y. B. Luo, J. Zhao, Y. Zheng, J. W. Xu, J. M. Ma, C. T. Liu, S. Z. Li and Q. Y. Yan, *ACS Nano*, 2019, **13**, 7975-7984.
- 13 X. F. Lu, S. L. Zhang, W. L. Sim, S. Y. Gao and X. W. Lou, *Angew. Chem. Int. Ed.*, 2021, **60**, 22885-22891.
- 14 R. Y. Wang, T. Wnag, C. Q. Feng, H. M. Wu, Y. Ding and H. Me, *Int. J. Hydrogen Energy*, 2021, **46**, 38247-38257.
- 15 Q. L. Xu, G. F. Qian, S. B. Yin, C. Yu, W. Chen, T. Q. Yu, L. Luo, Y. J. Xia and P. Tsiakaras, *ACS Sustain. Chem. Eng.*, 2020, **8**, 7174-7181.
- 16 K. L. Wang, W. Huang, Q. H. Cao, Y. J. Zhao, X. J. Sun, R. Ding, W. W. Lin, E. H. Liu and P. Gao, *Chem. Eng. J.*, 2022, **427**, 130865.
- 17 Z. Liu, S. J. Xue, S. F. Zhou, J. Li, K. G. Qu and W. W. Cai, *J. Catal.*, 2022, **405**, 606-613.
